# Supplementary material for: Genome-Wide Association Study of Root-Lesion Nematodes Pratylenchus Species and Crown Rot Fusarium culmorum in Bread Wheat
Source: MDPI journal article supplement (doi:10.3390/life12030372), 2022-03-04
Supplement: s1 [file s1]

## Article

# Genome-Wide Association Study of Root-Lesion Nematodes *Pratylenchus* Species and Crown Rot *Fusarium culmorum* in Bread Wheat

Quahir Sohail <sup>1</sup>, Gul Erginbas-Orakcı <sup>2</sup>, Fatih Ozdemir <sup>3</sup>, Abdulqader Jighly <sup>4</sup>, Susanne Dreisigacker <sup>5</sup>, Harun Bektas <sup>6</sup>, Nevzat Birişik <sup>7</sup>, Hakan Ozkan <sup>8,\*</sup> and Abdelfattah A. Dababat <sup>2,\*</sup>

## Supplementary Materials:

**Table S1.** (a) 189 bread wheat genotypes and controls genotypes used in this study, (b) Check spring wheat lines used in the study.

| (a) 189 bread wheat genotypes and controls genotypes used in this study |         |                                                                                                   |
|-------------------------------------------------------------------------|---------|---------------------------------------------------------------------------------------------------|
| S.#                                                                     | GID     | Pedigree                                                                                          |
| 1                                                                       | 6424869 | VORB*2/3/PFAU/WEAVER//KIRITATI                                                                    |
| 2                                                                       | 6487396 | CNDO/R143//ENTE/MEXI_2/3/AEGILOPS<br>SQUARROSA(TAUS)/4/WEAVER/5/2*JANZ/6/SKAUZ/BAV92              |
| 3                                                                       | 6174901 | ALTAR 84/AE.SQUARROSA<br>(221)//3*BORL95/3/URES/JUN//KAUZ/4/WBLL1/5/MILAN/S87230//BAV92           |
| 4                                                                       | 6424422 | KA/NAC//TRCH/4/MILAN/KAUZ//DHARWAR DRY/3/BAV92                                                    |
| 5                                                                       | 6681793 | ND643/2*WBLL1/4/WHEAR/KUKUNA/3/C80.1/3*BATAVIA//2*WBLL1                                           |
| 6                                                                       | 6624540 | C80.1/3*BATAVIA//2*WBLL1/3/EMB16/CBRD//CBRD/4/MILAN/KAUZ//DHARWAR<br>DRY/3/BAV92                  |
| 7                                                                       | 6624544 | C80.1/3*BATAVIA//2*WBLL1/3/EMB16/CBRD//CBRD/4/CHEWINK #1                                          |
| 8                                                                       | 6279929 | SOISSONS/KUKUNA//WBLL1*2/TUKURU                                                                   |
| 9                                                                       | 6176225 | FRET2/TUKURU//FRET2/3/MUNIA/CHTO//AMSEL/4/FRET2/TUKURU//FRET2                                     |
| 10                                                                      | 6280037 | HUANIL/5/2*CNO79//PF70354/MUS/3/PASTOR/4/BAV92                                                    |
| 11                                                                      | 6179276 | TACUPETO F2001/6/CNDO/R143//ENTE/MEXI_2/3/AEGILOPS SQUARROSA<br>(TAUS)/4/WEAVER/5/PASTOR/7/ROLF07 |
| 12                                                                      | 6176334 | ROLF07*2/5/REH/HARE//2*BCN/3/CROC_1/AE.SQUARROSA (213) //PGO/4/HUITES                             |
| 13                                                                      | 6176213 | BAV92//IRENA/KAUZ/3/HUITES/4/2*ROLF07                                                             |
| 14                                                                      | 6175962 | ATTILA*2/PBW65*2//KACHU                                                                           |
| 15                                                                      | 6280483 | BWD-4/3/ATTILA/BAV92//PASTOR/4/ATTILA*2/PBW65                                                     |
| 16                                                                      | 6178029 | PFAU/WEAVER//KIRITATI/3/FRET2/TUKURU//FRET2/4/FRET2/TUKURU//FRET2                                 |
| 17                                                                      | 6178997 | QUAIU/5/FRET2*2/4/SNI/TRAP#1/3/KAUZ*2/TRAP//KAUZ                                                  |
| 18                                                                      | 6175213 | ATTILA*2/PBW65*2/5/REH/HARE//2*BCN/3/CROC_1/AE.SQUARROSA (213)<br>//PGO/4/HUITES                  |
| 19                                                                      | 6175211 | ATTILA*2/PBW65*2/5/REH/HARE//2*BCN/3/CROC_1/AE.SQUARROSA<br>(213)//PGO/4/HUITES                   |
| 20                                                                      | 6181746 | WBLL1*2/BRAMBLING//JUCHI                                                                          |
| 21                                                                      | 6174889 | BECARD/KACHU                                                                                      |
| 22                                                                      | 6179291 | WBLL1*2/KUKUNA//KIRITATI/3/WBLL1*2/KUKUNA                                                         |
| 23                                                                      | 6568075 | KACHU//KIRITATI/2*TRCH<br>CROC_1/AE.SQUARROSA (205)                                               |
| 24                                                                      | 6566562 | //BORL95/3/PRL/SARA//TSI/VEE#5/4/FRET2/5/CHONTE/6/INQALAB<br>91*2/KUKUNA//KIRITATI                |
| 25                                                                      | 6463812 | BECARD #1/5/KIRITATI/4/2*SERI.1B*2/3/KAUZ*2/BOW//KAUZ                                             |

|    |         |                                                                                                                                                   |
|----|---------|---------------------------------------------------------------------------------------------------------------------------------------------------|
| 26 | 6682939 | WBLL1*2/BRAMBLING*2//BAVIS                                                                                                                        |
| 27 | 6179475 | PRL/2*PASTOR*2//VORB                                                                                                                              |
| 28 | 6280233 | BABAX/LR39//BABAX/3/VORB/4/SUNCO/2*PASTOR                                                                                                         |
| 29 | 6280250 | KRICHAUFF/2*PASTOR//SOKOLL                                                                                                                        |
| 30 | 6279600 | KANZ/5/CNO79//PF70354/MUS/3/PASTOR/4/BAV92/6/PRL/SARA//TSI/VEE#5                                                                                  |
| 31 | 6424850 | D67.2/PARANA 66.270//AE.SQUARROSA (320)/3/CUNNINGHAM/4/KAUZ/BAV92                                                                                 |
| 32 | 6280455 | KRICHAUFF/2*PASTOR/4/MILAN/KAUZ//PRINIA/3/BAV92                                                                                                   |
| 33 | 6624427 | KA/NAC//TRCH/3/VORB                                                                                                                               |
| 34 | 6624426 | KA/NAC//TRCH/3/VORB                                                                                                                               |
| 35 | 6424871 | VORB*2/3/PFAU/WEAVER//KIRITATI                                                                                                                    |
| 36 | 6174847 | TACUPETO F2001*2/BRAMBLING//WBLL1*2/BRAMBLING                                                                                                     |
| 37 | 6178935 | WBLL1*2/TUKURU//FN/2*PASTOR/3/FRET2/KIRITATI                                                                                                      |
| 38 | 6280219 | C80.1/3*BATAVIA//2*WBLL1/4/D67.2/PARANA 66.270//AE.SQUARROSA (320)<br>/3/CUNNINGHAM/5/T.DICOCCON PI225332/AE.SQUARROSA (895)<br>//WBLL1/3/2*WBLL1 |
| 39 | 6176013 | ROLF07/4/BOW/NKT//CBRD/3/CBRD/5/FRET2/TUKURU//FRET2                                                                                               |
| 40 | 6175947 | WBLL1*2/KURUKU//HEILO                                                                                                                             |
| 41 | 6683482 | KIRITATI//HUW234+LR34/PRINIA/3/BAJ #1                                                                                                             |
| 42 | 6683480 | KIRITATI//HUW234+LR34/PRINIA/3/BAJ #1                                                                                                             |
| 43 | 6569050 | DANPHE #1*2/CHYAK                                                                                                                                 |
| 44 | 6684188 | MUTUS*2//ND643/2*WBLL1                                                                                                                            |
| 45 | 6684341 | Unknown                                                                                                                                           |
| 46 | 6179370 | KSW/5/2*ALTAR 84/AE.SQUARROSA (221)//3*BORL95/3/URES/JUN//KAUZ/4/WBLL1                                                                            |
| 47 | 6174903 | ALTAR 84/AE.SQUARROSA<br>(221)//3*BORL95/3/URES/JUN//KAUZ/4/WBLL1/5/MILAN/S87230//BAV92                                                           |
| 48 | 6177552 | BAJ #1/AKURI                                                                                                                                      |
| 49 | 6174877 | WBLL1*2/4/SNI/TRAP#1/3/KAUZ*2/TRAP//KAUZ/5/BAJ #1                                                                                                 |
| 50 | 6178973 | PFAU/SERI.1B//AMAD/3/WAXWING/4/BABAX/LR42//BABAX*2/3/KURUKU                                                                                       |
| 51 | 6174860 | FRANCOLIN #1//WBLL1*2/BRAMBLING                                                                                                                   |
| 52 | 6175411 | WAXWING*2/HEILO                                                                                                                                   |
| 53 | 6176409 | ATTILA*2/PBW65*2//W485/HD29                                                                                                                       |
| 54 | 6174858 | FRANCOLIN #1/WBLL1                                                                                                                                |
| 55 | 6682916 | FRNCLN/3/KIRITATI//HUW234+LR34/PRINIA/4/FRANCOLIN #1                                                                                              |
| 56 | 6681419 | WAXWING*2/TUKURU//2*FRNCLN                                                                                                                        |
| 57 | 6682884 | FRNCLN/NIINI #1//FRANCOLIN #1                                                                                                                     |
| 58 | 6681477 | FRANCOLIN #1/CHONTE//FRNCLN                                                                                                                       |
| 59 | 6682434 | WAXWING*2/TUKURU/3/2*WHEAR/VIVITSI//WHEAR                                                                                                         |
| 60 | 6417653 | PFAU/SERI.1B//AMAD/3/WAXWING/4/BECARD                                                                                                             |
| 61 | 6175963 | ATTILA*2/PBW65*2//KACHU                                                                                                                           |
| 62 | 6280099 | PBW343*2/KUKUNA//WBLL1*2/KUKUNA                                                                                                                   |
| 63 | 6280103 | PBW343*2/KUKUNA//WBLL1*2/KUKUNA                                                                                                                   |
| 64 | 6280120 | SLVS/ATTILA//WBLL1/4/FRAME*2/3/URES/JUN//KAUZ                                                                                                     |
| 65 | 6280121 | SLVS/ATTILA//WBLL1/4/FRAME*2/3/URES/JUN//KAUZ                                                                                                     |
| 66 | 6279825 | SLVS/ATTILA//WBLL1*2/3/GONDO/CBRD                                                                                                                 |
| 67 | 6279829 | SLVS/ATTILA//WBLL1*2/3/GONDO/CBRD                                                                                                                 |
| 68 | 6415172 | BECARD/FRNCLN                                                                                                                                     |
| 69 | 6424312 | TOB/ERA//TOB/CNO67/3/PLO/4/VEE#5/5/KAUZ/6/FRET2/7/PASTOR//MILAN/KAUZ/3/<br>BAV92                                                                  |
| 70 | 6424301 | TOB/ERA//TOB/CNO67/3/PLO/4/VEE#5/5/KAUZ/6/FRET2/7/PASTOR//MILAN/KAUZ/3/<br>BAV92                                                                  |
| 71 | 6424434 | KA/NAC//TRCH/3/DANPHE #1                                                                                                                          |

|     |         |                                                                                                                     |
|-----|---------|---------------------------------------------------------------------------------------------------------------------|
| 72  | 6682171 | QUAIU*2/KINDE                                                                                                       |
| 73  | 6624392 | METSO/ER2000/5/2*SERI*3//RL6010/4*YR/3/PASTOR/4/BAV92                                                               |
| 74  | 6487493 | MON/IMU//ALD/PVN/3/BORL95/4/OASIS/2*BORL95/5/KAUZ/BAV92                                                             |
| 75  | 6487536 | TOB/ERA//TOB/CNO67/3/PLO/4/VEE#5/5/KAUZ/6/FRET2/7/MINO                                                              |
| 76  | 6177412 | WBLL1*2/KKTS//KINGBIRD #1                                                                                           |
| 77  | 6177411 | WBLL1*2/KKTS//KINGBIRD #1                                                                                           |
| 78  | 6327724 | BABAX/LR42//BABAX*2/3/KURUKU/4/KINGBIRD #1                                                                          |
| 79  | 6624455 | METSO/ER2000//MONARCA F2007/3/WBLL1*2/KKTS                                                                          |
| 80  | 6424619 | METSO/ER2000/3/EMB16/CBRD//CBRD                                                                                     |
| 81  | 6177544 | MILAN/S87230//BAV92/3/AKURI                                                                                         |
| 82  | 6341870 | MILAN/S87230//BAV92*2/3/AKURI                                                                                       |
|     |         | REH/HARE//2*BCN/3/CROC_1/AE.SQUARROSA (213)                                                                         |
|     |         | //PGO/4/HUITES/5/T.DICOCCON                                                                                         |
| 83  | 6356457 | PI94624/AE.SQUARROSA(409)//BCN/6/REH/HARE//2*BCN/3/CROC_1/AE.SQUARROSA (213)//PGO/4/HUITES/7/                       |
|     |         | MILAN/S87230//BAV92                                                                                                 |
| 84  | 6177447 | KBIRD//WBLL1*2/KURUKU                                                                                               |
| 85  | 6179542 | WBLL1*2/KURUKU/4/BABAX/LR42//BABAX*2/3/KURUKU                                                                       |
| 86  | 6175234 | WBLL1*2/KURUKU/6/CNDO/R143//ENTE/MEXI_2/3/AEGILOPS SQUARROSA (TAUS)/4/WEAVER/5/2*JANZ/7/WBLL1*2/KURUKU              |
| 87  | 6179538 | WBLL1*2/4/YACO/PBW65/3/KAUZ*2/TRAP//KAUZ*2/5/CHUANMAI 32                                                            |
| 88  | 6179255 | WBLL1*2/4/BABAX/LR42//BABAX/3/BABAX/LR42//BABAX                                                                     |
| 89  | 6174867 | WBLL1*2/BRAMBLING/5/WBLL1*2/4/SNI/TRAP#1/3/KAUZ*2/TRAP//KAUZ                                                        |
| 90  | 6179457 | TACUPETO F2001//WBLL1*2/KKTS/3/WBLL1*2/BRAMBLING                                                                    |
| 91  | 6179465 | WBLL1*2/TUKURU*2//KRONSTAD F2004                                                                                    |
| 92  | 6179463 | WBLL1*2/KURUKU//KRONSTAD F2004/3/WBLL1*2/BRAMBLING                                                                  |
| 93  | 6334696 | WBLL4/KUKUNA//WBLL1/3/WBLL1*2/BRAMBLING                                                                             |
| 94  | 6336692 | PANDORA//WBLL1*2/BRAMBLING/3/WBLL1*2/BRAMBLING                                                                      |
| 95  | 6335276 | MILAN/S87230//BAV92/3/WBLL1*2/BRAMBLING/4/WBLL1*2/BRAMBLING                                                         |
| 96  | 6418562 | TUKURU//BAV92/RAYON/3/WBLL1*2/BRAMBLING/4/WBLL1*2/BRAMBLING                                                         |
| 97  | 6624543 | C80.1/3*BATAVIA//2*WBLL1/3/EMB16/CBRD//CBRD/4/MILAN/KAUZ//DHARWAR DRY/3/BAV92                                       |
| 98  | 6624541 | C80.1/3*BATAVIA//2*WBLL1/3/EMB16/CBRD//CBRD/4/MILAN/KAUZ//DHARWAR DRY/3/BAV92                                       |
| 99  | 6341533 | PFAU/WEAVER*2//TUKURU/4/BABAX/LR42//BABAX*2/3/KURUKU/5/QUAIU                                                        |
| 100 | 6181747 | BABAX/LR42//BABAX/3/BABAX/LR42//BABAX/4/ATTILA/2*PASTOR/5/QUAIU #3                                                  |
| 101 | 6181748 | BABAX/LR42//BABAX/3/BABAX/LR42//BABAX/4/ATTILA/2*PASTOR/5/QUAIU #3                                                  |
| 102 | 304660  | LOCAL CHECK                                                                                                         |
| 103 | 6418598 | BABAX/LR42//BABAX*2/3/KUKUNA/4/CROSBILL #1/5/BECARD                                                                 |
| 104 | 6418597 | BABAX/LR42//BABAX*2/3/KUKUNA/4/CROSBILL #1/5/BECARD                                                                 |
| 105 | 6001673 | BOW/VEE/5/ND/VG9144//KAL/BB/3/YACO/4/CHIL/6/CASKOR/3/CROC_1/AE.SQUARR OSA (224)//OPATA/7/PASTOR//MILAN/KAUZ/3/BAV92 |
| 106 | 6336494 | KIRITATI/WBLL1/4/2*BABAX/LR42//BABAX*2/3/KURUKU                                                                     |
| 107 | 6336482 | KIRITATI/WBLL1//MESIA/3/KIRITATI/WBLL1                                                                              |
| 108 | 6342011 | BAJ #1*2/WHEAR                                                                                                      |
| 109 | 6415095 | VILLA JUAREZ F2009/CHYAK                                                                                            |
| 110 | 6417794 | ITP40/AKURI                                                                                                         |
| 111 | 6416942 | TACUPETO F2001*2/KIRITATI//VILLA JUAREZ F2009                                                                       |
| 112 | 6417113 | BECARD/QUAIU #1                                                                                                     |
| 113 | 6417117 | BECARD/QUAIU #1                                                                                                     |
| 114 | 6417213 | BECARD//ND643/2*WBLL1                                                                                               |

|     |         |                                                                             |
|-----|---------|-----------------------------------------------------------------------------|
| 115 | 6418480 | WBLL1*2/BRAMBLING//KINGBIRD #1                                              |
| 116 | 6415761 | FRET2*2/BRAMBLING//BECARD/3/WBLL1*2/BRAMBLING                               |
| 117 | 6683296 | PRL/2*PASTOR/3/PFAU/WEAVER*2//CHAPIO                                        |
|     |         | PRL/2*PASTOR/4/CHOIX/STAR/3/HE1/3*CNO79//2*SERI/5/KIRITATI/2*TRCH/6/PRL/2*P |
| 118 | 6681297 | ASTOR/4/                                                                    |
|     |         | CHOIX/STAR/3/HE1/3*CNO79//2*SERI                                            |
| 119 | 6624336 | SUNCO.6/FRAME//PASTOR/3/PAURAQ                                              |
| 120 | 6418261 | BECARD/3/PASTOR//MUNIA/ALTAR 84                                             |
| 121 | 6177947 | UP2338*2/VIVITSI/3/FRET2/TUKURU//FRET2/4/MISR 1                             |
| 122 | 6178556 | PRL/2*PASTOR*2//FH6-1-7                                                     |
| 123 | 6280591 | SOKOLL//INQALAB 91*2/KUKUNA                                                 |
| 124 | 6280415 | T.TAU.83.2.29/ATTILA//ATTILA/3/EXCALIBUR                                    |
| 125 | 6279632 | BABAX/KS93U76//BABAX/3/2*SOKOLL                                             |
| 126 | 6279631 | BABAX/KS93U76//BABAX/3/2*SOKOLL                                             |
| 127 | 6424403 | KA/NAC//TRCH/3/VORB                                                         |
| 128 | 6424400 | KA/NAC//TRCH/3/VORB                                                         |
| 129 | 6624413 | KA/NAC//TRCH/3/VORB                                                         |
| 130 | 6424865 | VORB*2/3/PFAU/WEAVER//KIRITATI                                              |
| 131 | 6176360 | WBLL1/FRET2//PASTOR*2/3/MURGA                                               |
| 132 | 6343460 | PFAU/MILAN//FISCAL/3/VORB/4/MILAN/S87230//BAV92                             |
| 133 | 5435924 | W15.92/4/PASTOR//HXL7573/2*BAU/3/WBLL1                                      |
| 134 | 6278943 | VORB/SOKOLL                                                                 |
| 135 | 6177174 | PFAU/SERI.1B//AMAD/3/WAXWING/4/HUIRIVIS #1                                  |
| 136 | 6177148 | TRCH/HUIRIVIS #1                                                            |
| 137 | 6177648 | PBW343*2/KUKUNA//TECUE #1                                                   |
| 138 | 6179222 | PBW343*2/KUKUNA*2//FRTL/PIFED                                               |
| 139 | 6179227 | PBW343*2/KUKUNA*2//FRTL/PIFED                                               |
| 140 | 6624440 | BERKUT/MUU//DANPHE #1                                                       |
| 141 | 6624418 | KA/NAC//TRCH/3/DANPHE #1                                                    |
| 142 | 6175662 | SITE/MO//PASTOR/3/TILHI/4/WAXWING/KIRITATI                                  |
| 143 | 6624365 | 1447/PASTOR//KRICHAUFF/3/PAURAQ                                             |
| 144 | 1987914 | HIDDAB                                                                      |
| 145 | 72533   | PROINTA FEDERAL                                                             |
| 146 | 109278  | DHARWAR DRY                                                                 |
| 147 | 6178533 | SAUAL/YANAC//SAUAL                                                          |
| 148 | 6176829 | SAUAL/3/ACHTAR*3//KANZ/KS85-8-4/4/SAUAL                                     |
| 149 | 6175076 | NAC/TH.AC//3*PVN/3/MIRLO/BUC/4/2*PASTOR/5/KACHU/6/KACHU                     |
| 150 | 6175067 | NAC/TH.AC//3*PVN/3/MIRLO/BUC/4/2*PASTOR/5/KACHU/6/KACHU                     |
| 151 | 6424629 | EMB16/CBRD//CBRD/4/BETTY/3/CHEN/AE.SQ//2*OPATA                              |
| 152 | 6175707 | MURGA/KRONSTAD F2004                                                        |
| 153 | 6176368 | KACHU #1/4/CROC_1/AE.SQUARROSA(205)//BORL95/3/2*MILAN/5/KACHU               |
| 154 | 6417583 | KACHU/KIRITATI                                                              |
| 155 | 6416954 | KACHU/KINDE                                                                 |
| 156 | 6177598 | KINGBIRD #1//INQALAB 91*2/TUKURU                                            |
| 157 | 6174884 | BECARD/KACHU                                                                |
| 158 | 6174886 | BECARD/KACHU                                                                |
| 159 | 6415858 | KACHU/BECARD//WBLL1*2/BRAMBLING                                             |
| 160 | 6337034 | FRNCLN*2/TECUE #1                                                           |
| 161 | 6337327 | PFAU/SERI.1B//AMAD/3/WAXWING/4/AKURI/5/PFAU/SERI.1B//AMAD/3/WAXWING         |
| 162 | 6176914 | MUNAL #1/FRANCOLIN #1                                                       |
| 163 | 6176308 | ATTILA*2/PBW65*2//MURGA                                                     |

|     |         |                                                                   |
|-----|---------|-------------------------------------------------------------------|
| 164 | 6176558 | ATTILA*2/PBW65*2/4/BOW/NKT//CBRD/3/CBRD                           |
| 165 | 6179562 | PBW343*2/KHVAKI*2//YANAC                                          |
| 166 | 6624429 | QING HAIBEI/WBLL1//BRBT2/3/PAURAQ                                 |
| 167 | 6332960 | KIRITATI/WBLL1//FRANCOLIN #1                                      |
| 168 | 6174892 | FRANCOLIN #1//WBLL1*2/KURUKU                                      |
| 169 | 6179347 | FRANCOLIN #1/4/BABAX/LR42//BABAX*2/3/KURUKU                       |
| 170 | 6415924 | PFAU/SERI.1B//AMAD/3/WAXWING*2/4/TECUE #1                         |
| 171 | 6416482 | ND643/2*TRCH/3/MILAN/S87230//BAV92/4/PFAU/SERI.1B//AMAD/3/WAXWING |
| 172 | 6414818 | PBW343*2/KUKUNA/3/PASTOR//CHIL/PRL/4/GRACK                        |
| 173 | 2430154 | PBW343                                                            |
| 174 | 6278982 | DUCULA/GONDO//SOKOLL                                              |
| 175 | 6278849 | H45/4/KRICHAUFF/FINSI/3/URES/PRL//BAV92                           |
| 176 | 6279585 | INQALAB 91*2/KUKUNA/4/TC14/2*HTG//DUCULA/3/PRINIA                 |
| 177 | 6424861 | KRICHAUFF/2*PASTOR//2*SOKOLL                                      |
| 178 | 6278811 | D67.2/PARANA 66.270//AE.SQUARROSA (320)/3/CUNNINGHAM/4/VORB       |
| 179 | 6278812 | D67.2/PARANA 66.270//AE.SQUARROSA (320)/3/CUNNINGHAM/4/VORB       |
| 180 | 3822784 | PRL/2*PASTOR                                                      |
| 181 | 6280583 | CHIH95.7.4//INQALAB 91*2/KUKUNA                                   |
| 182 | 6280588 | SOKOLL//INQALAB 91*2/KUKUNA                                       |
|     |         | VORB/6/CPI8/GEDIZ/3/GOO//ALB/CRA/4/AE.SQUARROSA                   |
| 183 | 6280393 | (208)/5/2*WESTONIA/7/CPI8/GEDIZ/3/GOO//ALB/CRA/4/AE.SQUARROSA     |
|     |         | (208)/5/2*WESTONIA                                                |
|     |         | VORB/4/D67.2/PARANA 66.270//AE.SQUARROSA                          |
| 184 | 6280381 | (320)/3/CUNNINGHAM/5/D67.2/PARANA 66.270//AE.SQUARROSA            |
|     |         | (320)/3/CUNNINGHAM                                                |
| 185 | 6487731 | VORB*2/5/CROC_1/AE.SQUARROSA(224)//OPATA/3/RAC655/4/SLVS/PASTOR   |
| 186 | 3855011 | VOROBAY                                                           |
| 187 | 6424874 | VORB*2/3/PFAU/WEAVER//KIRITATI                                    |
| 188 | 6278810 | D67.2/PARANA 66.270//AE.SQUARROSA (320)/3/CUNNINGHAM/4/VORB       |
| 189 | 6279005 | VORB/3/T.DICOCCON PI94625/AE.SQUARROSA (372)//3*PASTOR            |

(b) Check spring wheat lines used in the study

| S.# | GID | Pedigree                                            |
|-----|-----|-----------------------------------------------------|
| 190 | -   | 2 49 (Check-Cr,Mr)                                  |
| 191 | -   | Sunco (Check-Cr,Ms)                                 |
| 192 | -   | Altay(Check-Cr,Mr)                                  |
| 193 | -   | Seri(Check-Cr,S)                                    |
| 194 | -   | Suzen(Check-Cr,S)                                   |
| 195 | -   | CROC_1/Ae. squarrosa (224)//OPATA -(Check-Pt,Pn-Mr) |
| 196 | -   | Gatcher -(Check-Pt,Pn-S)                            |
| 197 | -   | Gs50a-(Check-Pt-Mr, Pn-S)                           |
| 198 | -   | Seri -(Check-Pt,Pn-S)                               |

**Table S2.** Arithmetic means of 189 spring wheat lines assessed under growth room conditions, greenhouse, and field conditions for root-lesion nematodes (PT and PN), and crown-rot (CR).

|     |         | <i>Pratylenchus thornei</i> <i>Pratylenchus neglectus</i> |      |      |      | <i>Fusarium culmorum</i> |      |                 |       |      |
|-----|---------|-----------------------------------------------------------|------|------|------|--------------------------|------|-----------------|-------|------|
|     |         | Growth room (GR)                                          |      |      |      | Growth room (GR)         |      | Greenhouse (GH) | Field |      |
| S.# | GID     | PT-1                                                      | PT-2 | PN-1 | PN-2 | CR-1                     | CR-2 | CR_GH           | CR_Y  | CR_K |
| 1   | 6424869 | 628                                                       | 755  | 635  | 525  | 3.00                     | 3.00 | 3.33            | 2.00  | 2.00 |
| 2   | 6487396 | 146                                                       | 131  | 317  | 907  | 3.40                     | 3.20 | 3.00            | 3.00  | 3.00 |
| 3   | 6174901 | 423                                                       | 1402 | 1680 | 1220 | 4.20                     | 4.60 | 1.00            | 2.00  | 2.00 |

|    |         |      |      |      |      |      |      |      |      |      |
|----|---------|------|------|------|------|------|------|------|------|------|
| 4  | 6424422 | 760  | 844  | 1677 | 2513 | 3.00 | 4.40 | 3.67 | 3.33 | 4.00 |
| 5  | 6681793 | 1309 | 1382 | 1100 | 1287 | 3.40 | 3.60 | 3.67 | 2.00 | 2.00 |
| 6  | 6624540 | 503  | 1720 | 823  | 933  | 2.00 | 2.40 | 3.67 | 1.67 | 2.00 |
| 7  | 6624544 | 389  | 1702 | 1537 | 2007 | 2.00 | 2.40 | 3.00 | 4.00 | 3.00 |
| 8  | 6279929 | 216  | 248  | 256  | 444  | 3.20 | 3.00 | 3.33 | 2.33 | 2.33 |
| 9  | 6176225 | 471  | 1291 | 666  | 860  | 3.00 | 4.00 | 3.67 | 2.00 | 2.00 |
| 10 | 6280037 | 236  | 1750 | 280  | 400  | 3.60 | 3.00 | 3.33 | 3.00 | 3.33 |
| 11 | 6179276 | 1356 | 580  | 473  | 435  | 3.40 | 3.60 | 4.00 | 3.33 | 3.33 |
| 12 | 6176334 | 62   | 92   | 151  | 140  | 3.60 | 3.40 | 3.00 | 2.67 | 4.00 |
| 13 | 6176213 | 671  | 836  | 2317 | 2400 | 3.20 | 3.20 | 3.00 | 3.33 | 3.00 |
| 14 | 6175962 | 102  | 452  | 42   | 736  | 4.00 | 2.00 | 3.33 | 3.33 | 3.67 |
| 15 | 6280483 | 270  | 632  | 150  | 865  | 3.00 | 3.20 | 3.00 | 3.67 | 3.33 |
| 16 | 6178029 | 1260 | 830  | 680  | 530  | 2.60 | 2.60 | 3.00 | 3.33 | 3.33 |
| 17 | 6178997 | 57   | 164  | 30   | 180  | 2.40 | 3.40 | 2.33 | 2.67 | 4.00 |
| 18 | 6175213 | 416  | 400  | 210  | 250  | 1.20 | 1.80 | 1.67 | 3.00 | 3.00 |
| 19 | 6175211 | 245  | 180  | 304  | 305  | 1.40 | 1.80 | 3.00 | 3.00 | 3.00 |
| 20 | 6181746 | 208  | 120  | 280  | 224  | 2.60 | 2.40 | 3.67 | 3.00 | 3.33 |
| 21 | 6174889 | 190  | 170  | 129  | 120  | 3.50 | 3.40 | 3.33 | 3.67 | 4.00 |
| 22 | 6179291 | 972  | 550  | 320  | 307  | 3.80 | 3.00 | 3.67 | 3.33 | 3.00 |
| 23 | 6568075 | 711  | 1109 | 1203 | 1353 | 3.20 | 3.00 | 4.00 | 2.00 | 1.67 |
| 24 | 6566562 | 369  | 1687 | 354  | 747  | 3.60 | 4.00 | 4.33 | 2.00 | 2.00 |
| 25 | 6463812 | 409  | 1207 | 400  | 707  | 2.20 | 2.40 | 1.67 | 3.33 | 3.33 |
| 26 | 6682939 | 434  | 684  | 1109 | 1307 | 3.40 | 3.20 | 3.67 | 3.00 | 3.33 |
| 27 | 6179475 | 768  | 592  | 625  | 400  | 2.20 | 2.20 | 3.33 | 3.00 | 3.33 |
| 28 | 6280233 | 112  | 160  | 244  | 345  | 2.40 | 2.60 | 3.33 | 2.33 | 2.00 |
| 29 | 6280250 | 736  | 715  | 790  | 908  | 1.60 | 1.40 | 3.33 | 3.33 | 2.67 |
| 30 | 6279600 | 315  | 1028 | 520  | 755  | 3.40 | 3.20 | 3.33 | 3.67 | 3.33 |
| 31 | 6424850 | 784  | 1204 | 469  | 608  | 3.00 | 3.00 | 3.33 | 3.67 | 3.33 |
| 32 | 6280455 | 572  | 2620 | 336  | 496  | 3.40 | 3.00 | 3.33 | 2.67 | 2.33 |
| 33 | 6624427 | 363  | 573  | 857  | 1860 | 3.00 | 3.00 | 2.00 | 3.00 | 2.00 |
| 34 | 6624426 | 214  | 1351 | 1057 | 1687 | 3.60 | 4.40 | 3.00 | 3.00 | 2.00 |
| 35 | 6424871 | 676  | 910  | 104  | 153  | 3.40 | 3.00 | 3.00 | 2.33 | 2.33 |
| 36 | 6174847 | 65   | 130  | 307  | 535  | 3.40 | 3.60 | 2.33 | 3.00 | 3.67 |
| 37 | 6178935 | 215  | 916  | 319  | 220  | 2.00 | 2.40 | 3.33 | 2.33 | 2.33 |
| 38 | 6280219 | 150  | 248  | 108  | 135  | 3.40 | 3.40 | 3.67 | 3.00 | 3.67 |
| 39 | 6176013 | 557  | 1287 | 1317 | 1440 | 4.20 | 4.40 | 3.33 | 4.00 | 3.33 |
| 40 | 6175947 | 89   | 222  | 65   | 470  | 2.00 | 2.00 | 3.00 | 3.00 | 4.00 |
| 41 | 6683482 | 720  | 1402 | 1163 | 1040 | 1.40 | 1.20 | 2.00 | 3.00 | 3.33 |
| 42 | 6683480 | 509  | 1247 | 171  | 507  | 2.40 | 2.40 | 2.00 | 3.67 | 2.00 |
| 43 | 6569050 | 426  | 2529 | 1171 | 1387 | 2.60 | 2.60 | 1.67 | 2.00 | 2.00 |
| 44 | 6684188 | 586  | 1667 | 1246 | 1473 | 1.40 | 1.60 | 3.00 | 2.00 | 2.00 |
| 45 | 6179370 | 928  | 1060 | 632  | 464  | 3.40 | 3.40 | 2.00 | 3.67 | 3.00 |
| 46 | 6174903 | 175  | 138  | 498  | 572  | 2.00 | 2.20 | 3.00 | 3.00 | 3.33 |
| 47 | 6177552 | 903  | 1260 | 1020 | 1260 | 3.60 | 3.40 | 3.67 | 3.00 | 3.00 |
| 48 | 6174877 | 900  | 944  | 1017 | 1033 | 3.20 | 3.40 | 4.33 | 2.67 | 2.00 |
| 49 | 6178973 | 162  | 131  | 219  | 535  | 3.40 | 3.40 | 3.00 | 3.00 | 3.33 |
| 50 | 6174860 | 1197 | 262  | 914  | 1093 | 3.80 | 4.00 | 4.00 | 3.00 | 2.00 |
| 51 | 6175411 | 206  | 514  | 448  | 472  | 3.00 | 3.20 | 3.67 | 3.00 | 3.67 |
| 52 | 6176409 | 40   | 839  | 25   | 145  | 3.40 | 3.40 | 3.33 | 3.00 | 3.67 |
| 53 | 6174858 | 41   | 146  | 325  | 412  | 3.20 | 3.40 | 2.33 | 3.00 | 2.67 |
| 54 | 6682916 | 629  | 1002 | 951  | 1267 | 2.00 | 2.40 | 4.00 | 2.00 | 2.00 |

|     |         |      |      |      |      |      |      |      |      |      |
|-----|---------|------|------|------|------|------|------|------|------|------|
| 55  | 6681419 | 540  | 1804 | 1131 | 1073 | 3.00 | 2.40 | 3.33 | 2.00 | 3.00 |
| 56  | 6682884 | 437  | 1344 | 1254 | 1607 | 3.00 | 3.00 | 3.33 | 1.67 | 2.00 |
| 57  | 6681477 | 866  | 2650 | 1577 | 1707 | 2.60 | 3.00 | 3.67 | 2.00 | 2.00 |
| 58  | 6682434 | 291  | 3060 | 1126 | 1153 | 3.00 | 2.40 | 3.00 | 2.00 | 3.33 |
| 59  | 6417653 | 891  | 480  | 3149 | 3653 | 4.40 | 3.20 | 2.33 | 3.00 | 3.33 |
| 60  | 6175963 | 529  | 844  | 1006 | 2173 | 4.00 | 3.60 | 3.67 | 4.00 | 3.67 |
| 61  | 6280099 | 304  | 840  | 584  | 630  | 3.20 | 3.80 | 3.33 | 3.67 | 3.00 |
| 62  | 6280103 | 204  | 1430 | 205  | 284  | 2.40 | 1.80 | 3.67 | 3.00 | 4.00 |
| 63  | 6280120 | 790  | 1775 | 700  | 292  | 1.80 | 1.80 | 2.67 | 3.33 | 3.67 |
| 64  | 6280121 | 284  | 627  | 432  | 584  | 3.40 | 3.20 | 3.50 | 2.33 | 2.00 |
| 65  | 6279825 | 220  | 1040 | 402  | 635  | 2.60 | 2.60 | 3.67 | 4.00 | 3.67 |
| 66  | 6279829 | 435  | 1155 | 545  | 370  | 3.60 | 3.40 | 3.33 | 3.67 | 3.33 |
| 67  | 6415172 | 751  | 1420 | 1049 | 1453 | 3.80 | 4.20 | 3.00 | 3.33 | 3.67 |
| 68  | 6424312 | 740  | 704  | 834  | 1020 | 3.20 | 3.60 | 2.00 | 3.33 | 3.00 |
| 69  | 6424301 | 683  | 1722 | 1391 | 1307 | 3.20 | 3.60 | 2.33 | 4.00 | 4.00 |
| 70  | 6424434 | 597  | 711  | 731  | 740  | 2.40 | 2.40 | 3.00 | 2.00 | 2.00 |
| 71  | 6682171 | 731  | 2191 | 234  | 633  | 2.00 | 2.40 | 2.00 | 2.00 | 3.33 |
| 72  | 6624392 | 771  | 940  | 1774 | 1453 | 3.40 | 3.40 | 3.00 | 3.00 | 3.00 |
| 73  | 6487493 | 569  | 564  | 1306 | 1473 | 2.60 | 2.40 | 3.67 | 3.00 | 3.00 |
| 74  | 6487536 | 397  | 871  | 1791 | 1913 | 3.60 | 3.60 | 4.00 | 3.67 | 3.67 |
| 75  | 6177412 | 720  | 935  | 348  | 475  | 3.40 | 3.00 | 3.33 | 3.33 | 4.00 |
| 76  | 6177411 | 614  | 488  | 232  | 105  | 2.40 | 2.20 | 3.33 | 2.00 | 3.67 |
| 77  | 6327724 | 649  | 1153 | 1891 | 2353 | 3.40 | 3.00 | 4.00 | 3.67 | 3.00 |
| 78  | 6624455 | 217  | 527  | 2191 | 2847 | 3.00 | 3.00 | 3.00 | 3.33 | 3.00 |
| 79  | 6424619 | 363  | 643  | 797  | 1033 | 3.20 | 3.40 | 3.67 | 3.00 | 1.67 |
| 80  | 6177544 | 663  | 987  | 2203 | 2333 | 2.60 | 3.00 | 3.67 | 3.00 | 3.00 |
| 81  | 6341870 | 311  | 822  | 411  | 460  | 2.40 | 1.00 | 4.33 | 2.00 | 3.33 |
| 82  | 6356457 | 714  | 360  | 486  | 480  | 2.60 | 3.60 | 2.00 | 3.00 | 2.00 |
| 83  | 6177447 | 358  | 790  | 501  | 350  | 3.60 | 2.60 | 3.00 | 3.00 | 3.67 |
| 84  | 6179542 | 200  | 175  | 440  | 576  | 1.60 | 1.80 | 3.00 | 2.67 | 2.33 |
| 85  | 6175234 | 570  | 684  | 426  | 450  | 2.60 | 2.00 | 3.33 | 3.00 | 3.00 |
| 86  | 6179538 | 725  | 480  | 95   | 100  | 3.00 | 2.60 | 3.00 | 2.00 | 2.33 |
| 87  | 6179255 | 831  | 940  | 663  | 573  | 3.00 | 4.00 | 3.33 | 3.67 | 3.67 |
| 88  | 6174867 | 106  | 258  | 166  | 170  | 2.40 | 2.20 | 3.33 | 2.33 | 2.33 |
| 89  | 6179457 | 1552 | 868  | 572  | 780  | 3.40 | 3.00 | 3.33 | 3.00 | 4.00 |
| 90  | 6179465 | 1260 | 840  | 552  | 340  | 3.00 | 3.00 | 3.00 | 2.33 | 2.67 |
| 91  | 6179463 | 852  | 745  | 375  | 445  | 3.00 | 3.60 | 2.00 | 2.67 | 3.00 |
| 92  | 6334696 | 429  | 1562 | 1091 | 1380 | 3.00 | 3.20 | 3.33 | 3.00 | 2.00 |
| 93  | 6336692 | 609  | 1098 | 1463 | 1427 | 2.80 | 2.40 | 3.00 | 2.00 | 2.00 |
| 94  | 6335276 | 169  | 1327 | 329  | 493  | 3.40 | 2.60 | 3.33 | 3.33 | 3.00 |
| 95  | 6418562 | 400  | 1062 | 709  | 333  | 3.20 | 2.60 | 4.00 | 3.00 | 3.00 |
| 96  | 6624543 | 363  | 3104 | 1423 | 1800 | 2.00 | 2.40 | 3.00 | 3.00 | 3.33 |
| 97  | 6624541 | 731  | 1933 | 1397 | 1920 | 2.60 | 2.40 | 3.00 | 2.00 | 3.00 |
| 98  | 6341533 | 483  | 604  | 1969 | 2680 | 3.20 | 3.40 | 3.67 | 3.33 | 3.33 |
| 99  | 6181747 | 1925 | 780  | 80   | 100  | 2.00 | 1.40 | 3.33 | 3.33 | 3.67 |
| 100 | 6181748 | 1456 | 1190 | 228  | 345  | 2.00 | 1.60 | 3.33 | 3.00 | 3.33 |
| 101 | 304660  | 426  | 1016 | 486  | 500  | 3.80 | 2.80 | 3.33 | 3.33 | 4.00 |
| 102 | 6418598 | 469  | 391  | 720  | 860  | 3.80 | 2.60 | 4.00 | 3.00 | 3.67 |
| 103 | 6418597 | 360  | 1576 | 311  | 587  | 4.40 | 3.00 | 4.33 | 3.67 | 3.33 |
| 104 | 6001673 | 1145 | 940  | 600  | 480  | 3.40 | 3.20 | 2.67 | 3.33 | 3.00 |
| 105 | 6336494 | 751  | 1207 | 1137 | 1193 | 3.40 | 4.40 | 2.00 | 3.00 | 3.00 |

|     |         |      |      |      |      |      |      |      |      |      |
|-----|---------|------|------|------|------|------|------|------|------|------|
| 106 | 6336482 | 866  | 1216 | 1774 | 1713 | 3.40 | 3.80 | 4.00 | 3.00 | 3.00 |
| 107 | 6342011 | 829  | 1162 | 1451 | 1787 | 3.40 | 3.80 | 3.67 | 3.00 | 2.00 |
| 108 | 6415095 | 663  | 1609 | 1074 | 1927 | 3.40 | 4.00 | 3.33 | 3.33 | 3.00 |
| 109 | 6417794 | 811  | 887  | 1469 | 1280 | 3.00 | 4.60 | 3.00 | 3.00 | 2.00 |
| 110 | 6416942 | 434  | 890  | 1414 | 1360 | 1.60 | 2.40 | 4.00 | 3.00 | 3.00 |
| 111 | 6417113 | 403  | 1049 | 1483 | 1333 | 3.80 | 3.80 | 4.00 | 3.00 | 3.67 |
| 112 | 6417117 | 577  | 2082 | 626  | 607  | 4.00 | 4.00 | 3.00 | 3.33 | 3.33 |
| 113 | 6417213 | 1109 | 1169 | 426  | 547  | 3.20 | 3.20 | 4.33 | 3.00 | 4.00 |
| 114 | 6418480 | 591  | 1680 | 423  | 387  | 3.60 | 4.00 | 3.67 | 3.00 | 3.33 |
| 115 | 6415761 | 1023 | 924  | 1243 | 1560 | 3.00 | 3.40 | 3.33 | 3.00 | 3.00 |
| 116 | 6683296 | 686  | 813  | 771  | 407  | 1.60 | 2.00 | 3.00 | 3.67 | 2.00 |
| 117 | 6681297 | 686  | 1713 | 674  | 773  | 3.40 | 3.00 | 1.67 | 2.00 | 3.00 |
| 118 | 6624336 | 743  | 1109 | 2054 | 2933 | 3.40 | 3.40 | 4.33 | 2.00 | 2.00 |
| 119 | 6418261 | 774  | 1060 | 1069 | 1080 | 3.60 | 3.20 | 3.67 | 3.00 | 3.33 |
| 120 | 6177947 | 79   | 137  | 221  | 284  | 2.40 | 2.25 | 3.00 | 3.00 | 3.00 |
| 121 | 6178556 | 204  | 318  | 207  | 215  | 2.00 | 2.00 | 2.67 | 3.33 | 4.00 |
| 122 | 6280591 | 88   | 198  | 132  | 155  | 3.00 | 3.40 | 4.00 | 3.00 | 3.33 |
| 123 | 6280415 | 148  | 345  | 105  | 172  | 2.40 | 2.60 | 3.33 | 3.67 | 3.33 |
| 124 | 6279632 | 236  | 1788 | 264  | 444  | 2.00 | 1.00 | 1.67 | 3.67 | 3.33 |
| 125 | 6279631 | 176  | 1410 | 108  | 632  | 1.80 | 1.40 | 2.67 | 2.67 | 2.33 |
| 126 | 6424403 | 383  | 651  | 949  | 2727 | 3.00 | 3.00 | 3.00 | 3.00 | 2.00 |
| 127 | 6424400 | 654  | 1387 | 2460 | 2080 | 3.80 | 3.20 | 3.00 | 1.67 | 1.00 |
| 128 | 6624413 | 106  | 376  | 1154 | 1980 | 4.00 | 2.40 | 3.33 | 2.00 | 2.00 |
| 129 | 6424865 | 418  | 660  | 760  | 470  | 3.40 | 3.00 | 3.67 | 2.67 | 2.33 |
| 130 | 6176360 | 903  | 967  | 2526 | 2900 | 3.00 | 3.20 | 3.00 | 3.00 | 2.00 |
| 131 | 6343460 | 440  | 598  | 857  | 1040 | 3.60 | 3.60 | 3.67 | 3.00 | 3.33 |
| 132 | 5435924 | 1196 | 370  | 692  | 576  | 3.40 | 3.40 | 3.33 | 3.33 | 4.33 |
| 133 | 6278943 | 152  | 135  | 335  | 300  | 3.00 | 2.00 | 3.33 | 3.00 | 3.67 |
| 134 | 6177174 | 756  | 149  | 293  | 90   | 2.40 | 2.60 | 4.00 | 3.33 | 3.33 |
| 135 | 6177148 | 266  | 675  | 317  | 655  | 2.40 | 2.60 | 4.33 | 4.00 | 3.67 |
| 136 | 6177648 | 209  | 397  | 718  | 495  | 3.20 | 4.00 | 3.67 | 2.67 | 3.67 |
| 137 | 6179222 | 220  | 1273 | 347  | 265  | 2.40 | 2.40 | 2.67 | 1.67 | 2.00 |
| 138 | 6179227 | 59   | 512  | 123  | 544  | 3.00 | 3.40 | 2.50 | 2.00 | 2.33 |
| 139 | 6624440 | 720  | 1687 | 1929 | 2593 | 3.40 | 3.20 | 3.00 | 2.33 | 3.00 |
| 140 | 6624418 | 509  | 1053 | 2060 | 2680 | 3.60 | 3.40 | 3.67 | 3.33 | 3.67 |
| 141 | 6175662 | 571  | 733  | 583  | 1813 | 1.60 | 2.00 | 2.33 | 3.33 | 3.33 |
| 142 | 6624365 | 534  | 711  | 820  | 1080 | 3.00 | 3.40 | 3.67 | 3.00 | 4.00 |
| 143 | 1987914 | 623  | 1104 | 2706 | 3047 | 3.40 | 3.40 | 3.00 | 2.00 | 2.00 |
| 144 | 72533   | 366  | 553  | 577  | 440  | 3.60 | 4.00 | 3.67 | 3.33 | 4.33 |
| 145 | 109278  | 1268 | 720  | 528  | 145  | 2.60 | 3.20 | 3.33 | 2.33 | 2.00 |
| 146 | 6178533 | 59   | 219  | 52   | 220  | 3.00 | 3.20 | 2.00 | 3.33 | 3.33 |
| 147 | 6176829 | 426  | 1260 | 1060 | 2313 | 2.40 | 1.80 | 2.00 | 3.00 | 3.00 |
| 148 | 6175076 | 358  | 337  | 639  | 727  | 3.20 | 3.20 | 3.50 | 2.00 | 2.00 |
| 149 | 6175067 | 843  | 531  | 1557 | 1767 | 1.80 | 1.60 | 3.33 | 3.67 | 3.00 |
| 150 | 6424629 | 291  | 391  | 2566 | 2187 | 2.60 | 4.00 | 2.00 | 2.00 | 2.00 |
| 151 | 6175707 | 156  | 204  | 634  | 432  | 3.00 | 3.00 | 2.33 | 2.67 | 3.67 |
| 152 | 6176368 | 357  | 420  | 577  | 700  | 1.40 | 2.40 | 3.33 | 2.00 | 4.00 |
| 153 | 6417583 | 494  | 1124 | 1409 | 1273 | 2.40 | 1.80 | 3.00 | 3.00 | 3.00 |
| 154 | 6416954 | 366  | 727  | 1034 | 840  | 1.60 | 3.00 | 1.67 | 2.00 | 3.00 |
| 155 | 6177598 | 275  | 195  | 116  | 190  | 2.40 | 2.20 | 3.33 | 3.00 | 4.00 |
| 156 | 6174884 | 886  | 1180 | 1460 | 1287 | 3.40 | 3.20 | 3.67 | 2.67 | 2.67 |



|     |         |      |      |      |      |      |      |      |      |      |
|-----|---------|------|------|------|------|------|------|------|------|------|
| 157 | 6174886 | 120  | 217  | 101  | 140  | 3.60 | 3.00 | 3.00 | 3.00 | 3.33 |
| 158 | 6415858 | 754  | 573  | 2126 | 2093 | 3.40 | 3.40 | 3.00 | 3.33 | 3.33 |
| 159 | 6337034 | 763  | 902  | 1960 | 2247 | 3.20 | 4.20 | 4.00 | 4.00 | 3.67 |
| 160 | 6337327 | 646  | 878  | 1260 | 1793 | 3.40 | 4.20 | 3.00 | 3.67 | 3.00 |
| 161 | 6176914 | 58   | 237  | 324  | 105  | 3.00 | 3.80 | 3.00 | 2.33 | 2.67 |
| 162 | 6176308 | 235  | 365  | 353  | 830  | 3.40 | 3.20 | 3.00 | 3.00 | 4.00 |
| 163 | 6176558 | 25   | 246  | 53   | 464  | 3.40 | 3.60 | 3.33 | 3.33 | 3.00 |
| 164 | 6179562 | 844  | 520  | 164  | 320  | 3.60 | 3.40 | 3.00 | 2.67 | 3.67 |
| 165 | 6624429 | 340  | 453  | 2291 | 2567 | 1.60 | 2.00 | 3.67 | 3.00 | 3.00 |
| 166 | 6332960 | 783  | 1800 | 1451 | 1540 | 3.40 | 3.20 | 3.00 | 2.00 | 2.00 |
| 167 | 6174892 | 977  | 1071 | 803  | 1480 | 3.20 | 3.40 | 3.00 | 4.00 | 3.33 |
| 168 | 6179347 | 340  | 240  | 60   | 310  | 3.20 | 3.40 | 2.00 | 2.67 | 2.00 |
| 169 | 6415924 | 469  | 549  | 1280 | 1280 | 2.40 | 2.40 | 3.33 | 3.67 | 4.00 |
| 170 | 6416482 | 597  | 1684 | 1686 | 1473 | 3.80 | 3.80 | 3.33 | 3.67 | 3.33 |
| 171 | 6414818 | 734  | 1107 | 1211 | 2453 | 2.20 | 2.40 | 3.33 | 3.33 | 3.67 |
| 172 | 2430154 | 58   | 262  | 128  | 465  | 2.40 | 2.60 | 2.33 | 3.33 | 3.00 |
| 173 | 6278982 | 640  | 153  | 510  | 280  | 2.00 | 1.00 | 4.00 | 3.33 | 3.00 |
| 174 | 6278849 | 212  | 155  | 85   | 80   | 2.00 | 1.60 | 4.00 | 3.00 | 4.33 |
| 175 | 6279585 | 128  | 244  | 120  | 775  | 3.60 | 3.00 | 4.00 | 3.33 | 3.67 |
| 176 | 6424861 | 192  | 180  | 205  | 95   | 3.20 | 2.40 | 3.33 | 3.33 | 3.33 |
| 177 | 6278811 | 256  | 135  | 195  | 132  | 1.40 | 1.80 | 3.33 | 3.00 | 4.00 |
| 178 | 6278812 | 160  | 345  | 388  | 480  | 2.40 | 2.20 | 2.33 | 2.00 | 2.00 |
| 179 | 3822784 | 232  | 308  | 120  | 108  | 3.40 | 3.40 | 2.33 | 2.67 | 4.00 |
| 180 | 6280583 | 224  | 105  | 124  | 80   | 3.40 | 3.20 | 4.33 | 3.33 | 4.00 |
| 181 | 6280588 | 124  | 333  | 80   | 136  | 3.20 | 3.40 | 4.00 | 3.33 | 3.33 |
| 182 | 6280393 | 135  | 170  | 160  | 75   | 3.00 | 2.80 | 3.00 | 2.67 | 3.00 |
| 183 | 6280381 | 95   | 170  | 85   | 272  | 2.40 | 2.40 | 3.00 | 2.00 | 4.00 |
| 184 | 6487731 | 214  | 982  | 1091 | 1293 | 3.20 | 3.60 | 3.00 | 3.33 | 3.33 |
| 185 | 3855011 | 1332 | 250  | 555  | 470  | 3.00 | 3.60 | 3.00 | 3.00 | 3.00 |
| 186 | 6424874 | 274  | 636  | 615  | 580  | 2.40 | 2.00 | 3.00 | 3.00 | 3.33 |
| 187 | 6278810 | 212  | 190  | 200  | 440  | 3.20 | 3.20 | 4.00 | 3.00 | 3.33 |
| 188 | 6279005 | 124  | 250  | 256  | 125  | 2.40 | 2.40 | 4.00 | 3.00 | 3.67 |
| 189 | 6487349 | 149  | 362  | 880  | 1253 | 2.60 | 3.00 | 3.33 | 3.00 | 3.00 |

**Table S3.** Arithmetic means of check spring wheat lines assessed under growth room (GR) conditions, greenhouse (GH), and field conditions (CR\_Y and CR\_K) for root-lesion nematodes (PT and PN) and crown-rot (CR).

| Names of check lines                             | <i>Pratylenchus thornei</i> <i>Pratylenchus neglectus</i> |     |                  |      | <i>Fusarium culmorum</i> |      |       |      |      |
|--------------------------------------------------|-----------------------------------------------------------|-----|------------------|------|--------------------------|------|-------|------|------|
|                                                  | Growth room (GR)                                          |     | Growth room (GR) |      | Greenhouse (GH)          |      | Field |      |      |
|                                                  | PT-1                                                      | PT2 | PN-1             | PN-2 | CR1                      | CR2  | CR_GH | CR_Y | CR_K |
| 2 49 (Check-Cr,Mr)                               | -                                                         | -   | -                | -    | 2.20                     | 2.40 | 2.30  | 2.20 | 2.20 |
| Sunco (Check-Cr,Ms)                              | -                                                         | -   | -                | -    | 2.50                     | 2.50 | 2.30  | 2.20 | 2.50 |
| Altay(Check-Cr,Mr)                               | -                                                         | -   | -                | -    | 2.50                     | 2.50 | 2.80  | 2.50 | 2.30 |
| Seri(Check-Cr,S)                                 | -                                                         | -   | -                | -    | 3.00                     | 3.30 | 3.20  | 3.50 | 3.00 |
| Suzen(Check-Cr,S)                                | -                                                         | -   | -                | -    | 2.20                     | 2.40 | 2.30  | 2.20 | 2.20 |
| Croc_1/Ae.squarrosa(224)//Opata-(Check-Pt,Pn-Mr) | 247                                                       | 264 | 243              | 410  | -                        | -    | -     | -    | -    |
| Gatcher -(Check-Pt,Pn-S)                         | 832                                                       | 670 | 626              | 660  | -                        | -    | -     | -    | -    |

---

|                           |     |     |     |      |   |   |   |   |   |
|---------------------------|-----|-----|-----|------|---|---|---|---|---|
| Gs50a-(Check-Pt-Mr, Pn-S) | 563 | 557 | 720 | 970  | - | - | - | - | - |
| Seri -(Check-Pt,Pn-S)     | 890 | 944 | 926 | 1100 | - | - | - | - | - |

---
